# Supplementary material for: Long-Term, Real-World Safety and Efficacy of Teneligliptin: A Post-Marketing Surveillance of More Than 10,000 Patients with Type 2 Diabetes in Japan
Source: PubMed Central journal article supplement — Adv Ther. 2019 Dec 23;37(3):1065–86. doi: 10.1007/s12325-019-01189-w (PMC7089720; doi:10.1007/s12325-019-01189-w), 2019-12-23
Supplement: 12325_2019_1189_MOESM1_ESM.pdf [file 12325_2019_1189_MOESM1_ESM.pdf]

## SUPPLEMENTARY MATERIALS

**Supplemental Table 1.** Use of concomitant antidiabetic agents

|                 | At start of teneligliptin<br>administration<br>(n = 10,696) | At 3 years of teneligliptin<br>administration<br>(n = 6,772) | During the<br>observation period<br>(n = 10,696) |
|-----------------|-------------------------------------------------------------|--------------------------------------------------------------|--------------------------------------------------|
| Monotherapy     | 5,863 (54.8%)                                               | 3,511 (51.8%)                                                | 5,126 (47.9%)                                    |
| Sulfonylurea    | 2,366 (22.1%)                                               | 1,493 (22.0%)                                                | 2,685 (25.1%)                                    |
| Biguanide       | 1,765 (16.5%)                                               | 1,374 (20.3%)                                                | 2,294 (21.4%)                                    |
| $\alpha$ -GI    | 1,074 (10.0%)                                               | 689 (10.2%)                                                  | 1,251 (11.7%)                                    |
| Thiazolidine    | 790 (7.4%)                                                  | 489 (7.2%)                                                   | 945 (8.8%)                                       |
| Insulin         | 726 (6.8%)                                                  | 392 (5.8%)                                                   | 821 (7.7%)                                       |
| Glinide         | 381 (3.6%)                                                  | 299 (4.4%)                                                   | 596 (5.6%)                                       |
| SGLT2 inhibitor | 28 (0.3%)                                                   | 285 (4.2%)                                                   | 429 (4.0%)                                       |

Values are number (%) of patients

$\alpha$ -GI,  $\alpha$ -glucosidase inhibitor; SGLT2, sodium–glucose cotransporter 2

**Supplemental Table 2.** Patient characteristics according to baseline renal function grade

|                                  | G1<br>(n = 2,008)             | G2<br>(n = 5,015)               | G3a<br>(n = 1,525)          | G3b<br>(n = 561)            | G4<br>(n = 217)            | G5<br>(n = 56)            | Patients on dialysis<br>(n = 156) |
|----------------------------------|-------------------------------|---------------------------------|-----------------------------|-----------------------------|----------------------------|---------------------------|-----------------------------------|
| Sex, male/female                 | 1,194 (59.5%)/<br>814 (40.5%) | 3,113 (62.1%)/<br>1,902 (37.9%) | 900 (59.0%)/<br>625 (41.0%) | 308 (54.9%)/<br>253 (45.1%) | 118 (54.4%)/<br>99 (45.6%) | 29 (51.8%)/<br>27 (48.2%) | 113 (72.4%)/<br>43 (27.6%)        |
| Age, years                       | 56.7 ± 12.9<br>(2,008)        | 65.6 ± 10.9<br>(5,015)          | 72.2 ± 9.7<br>(1,525)       | 74.3 ± 9.9<br>(561)         | 74.5 ± 10.8<br>(217)       | 69.2 ± 11.8<br>(56)       | 67.6 ± 10.2<br>(156)              |
| Duration of T2DM,<br>years       | 5.65 ± 6.32<br>(1,408)        | 7.04 ± 7.55<br>(3,541)          | 9.00 ± 8.76<br>(1,022)      | 10.48 ± 9.07<br>(392)       | 13.64 ± 9.78<br>(129)      | 13.12 ± 11.26<br>(35)     | 16.65 ± 9.23<br>(82)              |
| HbA1c, %                         | 8.51 ± 1.93<br>(1,889)        | 7.64 ± 1.35<br>(4,715)          | 7.37 ± 1.20<br>(1,432)      | 7.30 ± 1.21<br>(536)        | 7.34 ± 1.38<br>(202)       | 6.87 ± 1.10<br>(53)       | 6.73 ± 1.13<br>(103)              |
| GA, %                            | 21.73 ± 7.01<br>(89)          | 19.46 ± 7.08<br>(242)           | 19.82 ± 5.73<br>(70)        | 21.91 ± 8.30<br>(42)        | 19.53 ± 5.83<br>(26)       | 20.24 ± 5.68<br>(16)      | 23.40 ± 5.03<br>(92)              |
| FBG, mg/dL                       | 169.1 ± 64.0<br>(739)         | 147.5 ± 47.6<br>(1,849)         | 143.3 ± 46.2<br>(541)       | 148.6 ± 45.8<br>(205)       | 140.0 ± 39.1<br>(68)       | 121.3 ± 28.6<br>(20)      | 152.1 ± 57.3<br>(33)              |
| BMI, kg/m <sup>2</sup>           | 25.88 ± 5.11<br>(1,454)       | 25.07 ± 4.14<br>(3,483)         | 25.18 ± 4.14<br>(1,011)     | 25.15 ± 4.38<br>(400)       | 24.83 ± 4.36<br>(139)      | 23.84 ± 3.70<br>(36)      | 22.89 ± 3.16<br>(98)              |
| eGFR, mL/min/1.73 m <sup>2</sup> | 106.00 ± 16.10<br>(2,008)     | 74.28 ± 8.20<br>(5,015)         | 53.55 ± 4.23<br>(1,525)     | 38.57 ± 4.23<br>(561)       | 23.97 ± 4.22<br>(217)      | 8.91 ± 4.29<br>(56)       | —                                 |
| Diet therapy                     | 1,534 (76.4%)                 | 3,877 (77.3%)                   | 1,162 (76.2%)               | 437 (77.9%)                 | 170 (78.3%)                | 42 (75.0%)                | 141 (90.4%)                       |
| Exercise therapy                 | 1,250 (62.3%)                 | 3,110 (62.0%)                   | 847 (55.5%)                 | 303 (54.0%)                 | 106 (48.8%)                | 26 (46.4%)                | 54 (34.6%)                        |
| Any diabetic<br>complication     | 398 (19.8%)                   | 1,080 (21.5%)                   | 512 (33.6%)                 | 286 (51.0%)                 | 161 (74.2%)                | 39 (69.6%)                | 145 (92.9%)                       |
| Retinopathy                      | 154 (7.7%)                    | 420 (8.4%)                      | 179 (11.7%)                 | 105 (18.7%)                 | 54 (24.9%)                 | 20 (35.7%)                | 74 (47.4%)                        |
| Neuropathy                       | 133 (6.6%)                    | 454 (9.1%)                      | 198 (13.0%)                 | 109 (19.4%)                 | 48 (22.1%)                 | 12 (21.4%)                | 49 (31.4%)                        |
| Nephropathy                      | 249 (12.4%)                   | 672 (13.4%)                     | 393 (25.8%)                 | 255 (45.5%)                 | 150 (69.1%)                | 37 (66.1%)                | 144 (92.3%)                       |

Other complications

|               |               |               |               |             |             |            |             |
|---------------|---------------|---------------|---------------|-------------|-------------|------------|-------------|
| Hypertension  | 1,020 (50.8%) | 3,092 (61.7%) | 1,123 (73.6%) | 481 (85.7%) | 198 (91.2%) | 49 (87.5%) | 140 (89.7%) |
| Dyslipidaemia | 1,312 (65.3%) | 3,405 (67.9%) | 1,087 (71.3%) | 412 (73.4%) | 160 (73.7%) | 32 (57.1%) | 70 (44.9%)  |
| Heart disease | 157 (7.8%)    | 781 (15.6%)   | 409 (26.8%)   | 204 (36.4%) | 88 (40.6%)  | 18 (32.1%) | 73 (46.8%)  |

---

Values are number (%) of patients or mean  $\pm$  standard deviation (number of patients)

G, renal function grade; T2DM, type 2 diabetes mellitus; HbA1c, haemoglobin A1c; GA, glycated albumin; FBG, fasting blood glucose;

BMI, body mass index; eGFR, estimated glomerular filtration rate

**Supplemental Table 3.** Use of concomitant agents according to baseline renal function during the observation period

|                                       | G1<br>(n = 2,008) | G2<br>(n = 5,015) | G3a<br>(n = 1,525) | G3b<br>(n = 561) | G4<br>(n = 217) | G5<br>(n = 56) | Patients on dialysis<br>(n = 156) |
|---------------------------------------|-------------------|-------------------|--------------------|------------------|-----------------|----------------|-----------------------------------|
| <b>Antidiabetic agents</b>            |                   |                   |                    |                  |                 |                |                                   |
| Monotherapy                           | 910 (45.3%)       | 2,414 (48.1%)     | 713 (46.8%)        | 245 (43.7%)      | 95 (43.8%)      | 34 (60.7%)     | 91 (58.3%)                        |
| Sulfonylurea                          | 489 (24.4%)       | 1,277 (25.5%)     | 421 (27.6%)        | 158 (28.2%)      | 54 (24.9%)      | 7 (12.5%)      | 1 (0.6%)                          |
| Biguanide                             | 569 (28.3%)       | 1,136 (22.7%)     | 282 (18.5%)        | 58 (10.3%)       | 16 (7.4%)       | 3 (5.4%)       | 0                                 |
| α-GI                                  | 208 (10.4%)       | 558 (11.1%)       | 215 (14.1%)        | 92 (16.4%)       | 41 (18.9%)      | 7 (12.5%)      | 22 (14.1%)                        |
| Thiazolidine                          | 200 (10.0%)       | 430 (8.6%)        | 148 (9.7%)         | 58 (10.3%)       | 7 (3.2%)        | 2 (3.6%)       | 0                                 |
| Insulin                               | 152 (7.6%)        | 347 (6.9%)        | 120 (7.9%)         | 69 (12.3%)       | 39 (18.0%)      | 10 (17.9%)     | 36 (23.1%)                        |
| Glinide                               | 94 (4.7%)         | 287 (5.7%)        | 83 (5.4%)          | 44 (7.8%)        | 19 (8.8%)       | 5 (8.9%)       | 19 (12.2%)                        |
| SGLT2 inhibitor                       | 119 (5.9%)        | 213 (4.2%)        | 41 (2.7%)          | 8 (1.4%)         | 2 (0.9%)        | 1 (1.8%)       | 0                                 |
| <b>Other agents</b>                   |                   |                   |                    |                  |                 |                |                                   |
| Antihypertensive agents               | 762 (37.9%)       | 2,497 (49.8%)     | 936 (61.4%)        | 420 (74.9%)      | 168 (77.4%)     | 39 (69.6%)     | 121 (77.6%)                       |
| Antidyslipidaemic agents              | 693 (34.5%)       | 2,191 (43.7%)     | 755 (49.5%)        | 266 (47.4%)      | 111 (51.2%)     | 25 (44.6%)     | 42 (26.9%)                        |
| Erythropoiesis-<br>stimulating agents | 0                 | 1 (<0.1%)         | 1 (0.1%)           | 8 (1.4%)         | 11 (5.1%)       | 6 (10.7%)      | 33 (21.2%)                        |

Values are number (%) of patients

G, renal function grade; α-GI, α-glucosidase inhibitor; SGLT2, sodium–glucose cotransporter 2

**Supplemental Table 4.** ADRs and AEs of special interest in  $\geq 2$  patients (any ADR) or  $\geq 1$  patient(serious ADR) and other ADRs in  $\geq 10$  patients

| Patients analysed for safety                        | 10,696     |              |
|-----------------------------------------------------|------------|--------------|
|                                                     | All ADRs   | Serious ADRs |
| <b>Hypoglycaemia-related ADRs</b>                   |            |              |
| N (%)                                               | 38 (0.36%) | 8 (0.07%)    |
| per 100 patient-years                               | 0.15       | 0.03         |
| Hypoglycaemia                                       | 28 (0.26%) | 6 (0.06%)    |
| Blood glucose decreased                             | 9 (0.08%)  | 1 (0.01%)    |
| Hypoglycaemic unconsciousness                       | 1 (0.01%)  | 1 (0.01%)    |
| <b>Skin and subcutaneous tissue disorders, ADRs</b> |            |              |
| N (%)                                               | 44 (0.41%) | 6 (0.06%)    |
| per 100 patient-years                               | 0.17       | 0.02         |
| Rash                                                | 13 (0.12%) | 1 (0.01%)    |
| Pruritus                                            | 9 (0.08%)  | 0            |
| Pemphigoid                                          | 5 (0.05%)  | 5 (0.05%)    |
| Drug eruption                                       | 4 (0.04%)  | 0            |
| Urticaria                                           | 4 (0.04%)  | 0            |
| Eczema                                              | 2 (0.02%)  | 0            |
| Rash generalised                                    | 2 (0.02%)  | 0            |
| <b>Gastrointestinal disorders, ADRs</b>             |            |              |
| N (%)                                               | 73 (0.68%) | 12 (0.11%)   |
| per 100 patient-years                               | 0.29       | 0.05         |
| Constipation                                        | 29 (0.27%) | 0            |
| Abdominal distension                                | 6 (0.06%)  | 0            |
| Nausea                                              | 6 (0.06%)  | 0            |
| Abdominal discomfort                                | 5 (0.05%)  | 0            |
| Diarrhoea                                           | 4 (0.04%)  | 0            |
| Intestinal obstruction (ileus)                      | 4 (0.04%)  | 4 (0.04%)    |
| Abdominal pain                                      | 3 (0.03%)  | 0            |
| Abdominal pain upper                                | 3 (0.03%)  | 0            |
| Dyspepsia                                           | 3 (0.03%)  | 0            |
| Gastrointestinal disorders                          | 3 (0.03%)  | 0            |
| Gastrooesophageal reflux disease                    | 2 (0.02%)  | 0            |
| Gastric ulcer                                       | 1 (0.01%)  | 1 (0.01%)    |
| Gastric ulcer haemorrhage                           | 1 (0.01%)  | 1 (0.01%)    |

|                                      |            |            |
|--------------------------------------|------------|------------|
| Inguinal hernia                      | 1 (0.01%)  | 1 (0.01%)  |
| Intestinal ischaemia                 | 1 (0.01%)  | 1 (0.01%)  |
| Large intestine perforation          | 1 (0.01%)  | 1 (0.01%)  |
| Pancreatitis acute                   | 1 (0.01%)  | 1 (0.01%)  |
| Large intestine polyp                | 1 (0.01%)  | 1 (0.01%)  |
| Oesophageal motility disorder        | 1 (0.01%)  | 1 (0.01%)  |
| <b>Hepatic impairments, ADRs</b>     |            |            |
| N (%)                                | 47 (0.44%) | 4 (0.04%)  |
| per 100 patient-years                | 0.18       | 0.02       |
| Hepatic function abnormal            | 28 (0.26%) | 3 (0.03%)  |
| Aspartate aminotransferase increased | 8 (0.07%)  | 0          |
| Alanine aminotransferase increased   | 7 (0.07%)  | 0          |
| Liver disorder                       | 4 (0.04%)  | 0          |
| Hepatic enzyme increased             | 3 (0.03%)  | 0          |
| Blood bilirubin increased            | 2 (0.02%)  | 0          |
| Hepatitis acute                      | 1 (0.01%)  | 1 (0.01%)  |
| <b>Renal impairments, ADRs</b>       |            |            |
| N (%)                                | 34 (0.32%) | 7 (0.07%)  |
| per 100 patient-years                | 0.13       | 0.03       |
| Renal impairment                     | 7 (0.07%)  | 2 (0.02%)  |
| Blood creatinine increased           | 7 (0.07%)  | 1 (0.01%)  |
| Proteinuria                          | 7 (0.07%)  | 0          |
| Protein urine present                | 3 (0.03%)  | 0          |
| Nephrotic syndrome                   | 2 (0.02%)  | 2 (0.02%)  |
| Blood urea increased                 | 2 (0.02%)  | 0          |
| Hyperkalaemia                        | 2 (0.02%)  | 0          |
| Diabetic nephropathy                 | 2 (0.02%)  | 0          |
| Acute kidney injury                  | 1 (0.01%)  | 1 (0.01%)  |
| Haemodialysis                        | 1 (0.01%)  | 1 (0.01%)  |
| Hypoalbuminaemia                     | 1 (0.01%)  | 1 (0.01%)  |
| <b>Cardiovascular events, AE</b>     |            |            |
| N (%)                                | 85 (0.79%) | 76 (0.71%) |
| per 100 patient-years                | 0.33       | 0.30       |
| Cerebral infarction                  | 24 (0.22%) | 24 (0.22%) |
| Acute myocardial infarction          | 8 (0.07%)  | 8 (0.07%)  |
| Angina unstable                      | 7 (0.07%)  | 7 (0.07%)  |
| Myocardial infarction                | 7 (0.07%)  | 7 (0.07%)  |

|                                        |             |             |
|----------------------------------------|-------------|-------------|
| Subdural haematoma                     | 6 (0.06%)   | 6 (0.06%)   |
| Carotid artery stenosis                | 5 (0.05%)   | 3 (0.03%)   |
| Cerebral haemorrhage                   | 5 (0.05%)   | 5 (0.05%)   |
| Blood creatine phosphokinase increased | 4 (0.04%)   | 0           |
| Lacunar infarction                     | 3 (0.03%)   | 3 (0.03%)   |
| Subarachnoid haemorrhage               | 2 (0.02%)   | 2 (0.02%)   |
| Transient ischaemic attack             | 2 (0.02%)   | 1 (0.01%)   |
| Carotid artery thrombosis              | 1 (0.01%)   | 1 (0.01%)   |
| Cerebellar haemorrhage                 | 1 (0.01%)   | 1 (0.01%)   |
| Cerebral ischaemia                     | 1 (0.01%)   | 1 (0.01%)   |
| Cerebrovascular accident               | 1 (0.01%)   | 1 (0.01%)   |
| Embolic stroke                         | 1 (0.01%)   | 1 (0.01%)   |
| Haemorrhage intracranial               | 1 (0.01%)   | 1 (0.01%)   |
| Intracranial aneurysm                  | 1 (0.01%)   | 1 (0.01%)   |
| Subdural haemorrhage                   | 1 (0.01%)   | 1 (0.01%)   |
| Acute coronary syndrome                | 1 (0.01%)   | 1 (0.01%)   |
| Putamen haemorrhage                    | 1 (0.01%)   | 1 (0.01%)   |
| <b>Cardiovascular events, ADRs</b>     |             |             |
| N (%)                                  | 18 (0.17%)  | 14 (0.13%)  |
| per 100 patient-years                  | 0.07        | 0.05        |
| Cerebral infarction                    | 3 (0.03%)   | 3 (0.03%)   |
| Blood creatine phosphokinase increased | 3 (0.03%)   | 0           |
| Myocardial infarction                  | 2 (0.02%)   | 2 (0.02%)   |
| Acute myocardial infarction            | 1 (0.01%)   | 1 (0.01%)   |
| Angina unstable                        | 1 (0.01%)   | 1 (0.01%)   |
| Carotid artery stenosis                | 1 (0.01%)   | 1 (0.01%)   |
| Cerebellar haemorrhage                 | 1 (0.01%)   | 1 (0.01%)   |
| Cerebral haemorrhage                   | 1 (0.01%)   | 1 (0.01%)   |
| Cerebral ischaemia                     | 1 (0.01%)   | 1 (0.01%)   |
| Subarachnoid haemorrhage               | 1 (0.01%)   | 1 (0.01%)   |
| Lacunar infarction                     | 1 (0.01%)   | 1 (0.01%)   |
| Putamen haemorrhage                    | 1 (0.01%)   | 1 (0.01%)   |
| <b>Malignant tumours, AEs</b>          |             |             |
| N (%)                                  | 111 (1.04%) | 111 (1.04%) |
| per 100 patient-years                  | 0.44        | 0.44        |
| Pancreatic carcinoma                   | 15 (0.14%)  | 15 (0.14%)  |
| Colon cancer                           | 14 (0.13%)  | 14 (0.13%)  |

|                                                |            |            |
|------------------------------------------------|------------|------------|
| Gastric cancer                                 | 13 (0.12%) | 13 (0.12%) |
| Lung neoplasm malignant                        | 11 (0.10%) | 11 (0.10%) |
| Bladder cancer                                 | 8 (0.07%)  | 8 (0.07%)  |
| Hepatocellular carcinoma                       | 7 (0.07%)  | 7 (0.07%)  |
| Lymphoma                                       | 6 (0.06%)  | 6 (0.06%)  |
| Breast cancer                                  | 5 (0.05%)  | 5 (0.05%)  |
| Rectal cancer                                  | 5 (0.05%)  | 5 (0.05%)  |
| Prostate cancer                                | 5 (0.05%)  | 5 (0.05%)  |
| Gallbladder cancer                             | 3 (0.03%)  | 3 (0.03%)  |
| Acute leukaemia                                | 2 (0.02%)  | 2 (0.02%)  |
| Renal cancer                                   | 2 (0.02%)  | 2 (0.02%)  |
| Hepatic cancer                                 | 2 (0.02%)  | 2 (0.02%)  |
| Bile duct cancer                               | 1 (0.01%)  | 1 (0.01%)  |
| Cholangiocarcinoma                             | 1 (0.01%)  | 1 (0.01%)  |
| Chronic myeloid leukaemia                      | 1 (0.01%)  | 1 (0.01%)  |
| Gallbladder cancer recurrent                   | 1 (0.01%)  | 1 (0.01%)  |
| Lung carcinoma cell type unspecified recurrent | 1 (0.01%)  | 1 (0.01%)  |
| Malignant neoplasm of conjunctiva              | 1 (0.01%)  | 1 (0.01%)  |
| Malignant neoplasm of renal pelvis             | 1 (0.01%)  | 1 (0.01%)  |
| Metastases to liver                            | 1 (0.01%)  | 1 (0.01%)  |
| Oesophageal carcinoma                          | 1 (0.01%)  | 1 (0.01%)  |
| Ovarian cancer                                 | 1 (0.01%)  | 1 (0.01%)  |
| Plasma cell myeloma                            | 1 (0.01%)  | 1 (0.01%)  |
| Prostate cancer metastatic                     | 1 (0.01%)  | 1 (0.01%)  |
| Uterine cancer                                 | 1 (0.01%)  | 1 (0.01%)  |
| Small intestine carcinoma                      | 1 (0.01%)  | 1 (0.01%)  |
| Thyroid cancer metastatic                      | 1 (0.01%)  | 1 (0.01%)  |
| Salivary gland cancer                          | 1 (0.01%)  | 1 (0.01%)  |
| Thyroid cancer                                 | 1 (0.01%)  | 1 (0.01%)  |
| Renal cell carcinoma                           | 1 (0.01%)  | 1 (0.01%)  |

---

**Malignant tumours, ADRs**

|                       |            |            |
|-----------------------|------------|------------|
| N (%)                 | 27 (0.25%) | 27 (0.25%) |
| per 100 patient-years | 0.11       | 0.11       |
| Pancreatic carcinoma  | 5 (0.05%)  | 5 (0.05%)  |
| Colon cancer          | 4 (0.04%)  | 4 (0.04%)  |
| Gastric cancer        | 4 (0.04%)  | 4 (0.04%)  |
| Bladder cancer        | 2 (0.02%)  | 2 (0.02%)  |

---



|                                     |            |           |
|-------------------------------------|------------|-----------|
| Breast cancer                       | 2 (0.02%)  | 2 (0.02%) |
| Gallbladder cancer                  | 2 (0.02%)  | 2 (0.02%) |
| Lymphoma                            | 2 (0.02%)  | 2 (0.02%) |
| Lung neoplasm malignant             | 2 (0.02%)  | 2 (0.02%) |
| Bile duct cancer                    | 1 (0.01%)  | 1 (0.01%) |
| Ovarian cancer                      | 1 (0.01%)  | 1 (0.01%) |
| Plasma cell myeloma                 | 1 (0.01%)  | 1 (0.01%) |
| Rectal cancer                       | 1 (0.01%)  | 1 (0.01%) |
| Prostate cancer                     | 1 (0.01%)  | 1 (0.01%) |
| <b>Other ADRs (in ≥10 patients)</b> |            |           |
| Dizziness, N (%)                    | 11 (0.10%) | 0         |

Values are number (%) of patients. ADRs were defined as adverse events for which a causal relationship with teneligliptin could not be excluded (i.e., related or unknown)

AE, adverse event; ADR, adverse drug reaction

**Supplemental Table 5.** Complete listing of adverse drug reactions by system organ

class/preferred term

| <b>Patients analysed for safety</b>                                            | <b>10,696</b>      |                     |
|--------------------------------------------------------------------------------|--------------------|---------------------|
|                                                                                | <b>All ADRs</b>    | <b>Serious ADRs</b> |
| <b>Number of patients with ADRs</b>                                            | <b>412 (3.85%)</b> | <b>117 (1.09%)</b>  |
| <b>Number of events of ADRs</b>                                                | <b>489 events</b>  | <b>133 events</b>   |
| <b>Infections and infestations</b>                                             | <b>19 (0.18%)</b>  | <b>7 (0.07%)</b>    |
| Herpes zoster                                                                  | 6 (0.06%)          | 1 (0.01%)           |
| Pneumonia                                                                      | 3 (0.03%)          | 2 (0.02%)           |
| Upper respiratory tract infection                                              | 3 (0.03%)          | 0                   |
| Cystitis                                                                       | 2 (0.02%)          | 0                   |
| Peritonitis                                                                    | 1 (0.01%)          | 1 (0.01%)           |
| Pyelonephritis acute                                                           | 1 (0.01%)          | 1 (0.01%)           |
| Sepsis                                                                         | 1 (0.01%)          | 1 (0.01%)           |
| Pneumonia bacterial                                                            | 1 (0.01%)          | 1 (0.01%)           |
| Angular cheilitis                                                              | 1 (0.01%)          | 0                   |
| Bronchitis                                                                     | 1 (0.01%)          | 0                   |
| Gastroenteritis                                                                | 1 (0.01%)          | 0                   |
| Otitis media                                                                   | 1 (0.01%)          | 0                   |
| <b>Neoplasms benign, malignant and unspecified, including cysts and polyps</b> | <b>29 (0.27%)</b>  | <b>29 (0.27%)</b>   |
| Pancreatic carcinoma                                                           | 5 (0.05%)          | 5 (0.05%)           |
| Colon cancer                                                                   | 4 (0.04%)          | 4 (0.04%)           |
| Gastric cancer                                                                 | 4 (0.04%)          | 4 (0.04%)           |
| Bladder cancer                                                                 | 2 (0.02%)          | 2 (0.02%)           |
| Breast cancer                                                                  | 2 (0.02%)          | 2 (0.02%)           |
| Gallbladder cancer                                                             | 2 (0.02%)          | 2 (0.02%)           |
| Lymphoma                                                                       | 2 (0.02%)          | 2 (0.02%)           |
| Lung neoplasm malignant                                                        | 2 (0.02%)          | 2 (0.02%)           |
| Bile duct cancer                                                               | 1 (0.01%)          | 1 (0.01%)           |
| Ovarian cancer                                                                 | 1 (0.01%)          | 1 (0.01%)           |
| Plasma cell myeloma                                                            | 1 (0.01%)          | 1 (0.01%)           |
| Rectal cancer                                                                  | 1 (0.01%)          | 1 (0.01%)           |
| Prostate cancer                                                                | 1 (0.01%)          | 1 (0.01%)           |
| Brain neoplasm                                                                 | 1 (0.01%)          | 1 (0.01%)           |
| Ureteral neoplasm                                                              | 1 (0.01%)          | 1 (0.01%)           |

|                                             |                   |                   |
|---------------------------------------------|-------------------|-------------------|
| <b>Blood and lymphatic system disorders</b> | <b>7 (0.07%)</b>  | <b>1 (0.01%)</b>  |
| Iron deficiency anaemia                     | 3 (0.03%)         | 0                 |
| Anaemia                                     | 2 (0.02%)         | 0                 |
| Eosinophilia                                | 1 (0.01%)         | 1 (0.01%)         |
| Polycythaemia                               | 1 (0.01%)         | 0                 |
| <b>Metabolism and nutrition disorders</b>   | <b>44 (0.41%)</b> | <b>9 (0.08%)</b>  |
| Hypoglycaemia                               | 28 (0.26%)        | 6 (0.06%)         |
| Decreased appetite                          | 2 (0.02%)         | 2 (0.02%)         |
| Hyperkalaemia                               | 2 (0.02%)         | 0                 |
| Hypertriglyceridaemia                       | 2 (0.02%)         | 0                 |
| Hypoalbuminaemia                            | 1 (0.01%)         | 1 (0.01%)         |
| Diabetic ketosis                            | 1 (0.01%)         | 1 (0.01%)         |
| Dehydration                                 | 1 (0.01%)         | 0                 |
| Diabetes mellitus                           | 1 (0.01%)         | 0                 |
| Diabetes mellitus inadequate control        | 1 (0.01%)         | 0                 |
| Electrolyte imbalance                       | 1 (0.01%)         | 0                 |
| Hypercholesterolaemia                       | 1 (0.01%)         | 0                 |
| Hyperglycaemia                              | 1 (0.01%)         | 0                 |
| Hyperuricaemia                              | 1 (0.01%)         | 0                 |
| Hyponatraemia                               | 1 (0.01%)         | 0                 |
| Lipid metabolism disorder                   | 1 (0.01%)         | 0                 |
| Hyperamylasaemia                            | 1 (0.01%)         | 0                 |
| Hypo HDL cholesterolaemia                   | 1 (0.01%)         | 0                 |
| <b>Psychiatric disorders</b>                | <b>4 (0.04%)</b>  | <b>0</b>          |
| Insomnia                                    | 2 (0.02%)         | 0                 |
| Anger                                       | 1 (0.01%)         | 0                 |
| Eating disorder                             | 1 (0.01%)         | 0                 |
| <b>Nervous system disorders</b>             | <b>37 (0.35%)</b> | <b>11 (0.10%)</b> |
| Dizziness                                   | 11 (0.10%)        | 0                 |
| Headache                                    | 5 (0.05%)         | 0                 |
| Cerebral infarction                         | 3 (0.03%)         | 3 (0.03%)         |
| Somnolence                                  | 3 (0.03%)         | 0                 |
| Hypoaesthesia                               | 2 (0.02%)         | 0                 |
| Carotid artery stenosis                     | 1 (0.01%)         | 1 (0.01%)         |
| Cerebellar haemorrhage                      | 1 (0.01%)         | 1 (0.01%)         |
| Cerebral haemorrhage                        | 1 (0.01%)         | 1 (0.01%)         |
| Cerebral ischaemia                          | 1 (0.01%)         | 1 (0.01%)         |

|                                       |                   |                  |
|---------------------------------------|-------------------|------------------|
| Subarachnoid haemorrhage              | 1 (0.01%)         | 1 (0.01%)        |
| Lacunar infarction                    | 1 (0.01%)         | 1 (0.01%)        |
| Putamen haemorrhage                   | 1 (0.01%)         | 1 (0.01%)        |
| Hypoglycaemic unconsciousness         | 1 (0.01%)         | 1 (0.01%)        |
| Dementia Alzheimer's type             | 1 (0.01%)         | 0                |
| Dysgeusia                             | 1 (0.01%)         | 0                |
| Head discomfort                       | 1 (0.01%)         | 0                |
| Loss of consciousness                 | 1 (0.01%)         | 0                |
| Dysstasia                             | 1 (0.01%)         | 0                |
| <b>Eye disorders</b>                  | <b>5 (0.05%)</b>  | <b>4 (0.04%)</b> |
| Cataract                              | 2 (0.02%)         | 2 (0.02%)        |
| Diabetic retinal oedema               | 1 (0.01%)         | 1 (0.01%)        |
| Retinal detachment                    | 1 (0.01%)         | 1 (0.01%)        |
| Vitreous haemorrhage                  | 1 (0.01%)         | 1 (0.01%)        |
| Vitreous floaters                     | 1 (0.01%)         | 0                |
| <b>Ear and labyrinth disorders</b>    | <b>2 (0.02%)</b>  | <b>1 (0.01%)</b> |
| Sudden hearing loss                   | 1 (0.01%)         | 1 (0.01%)        |
| Tinnitus                              | 1 (0.01%)         | 0                |
| <b>Cardiac disorders</b>              | <b>18 (0.17%)</b> | <b>9 (0.08%)</b> |
| Ventricular extrasystoles             | 4 (0.04%)         | 0                |
| Atrial fibrillation                   | 3 (0.03%)         | 1 (0.01%)        |
| Cardiac failure congestive            | 2 (0.02%)         | 2 (0.02%)        |
| Myocardial infarction                 | 2 (0.02%)         | 2 (0.02%)        |
| Acute myocardial infarction           | 1 (0.01%)         | 1 (0.01%)        |
| Angina unstable                       | 1 (0.01%)         | 1 (0.01%)        |
| Cardiac failure acute                 | 1 (0.01%)         | 1 (0.01%)        |
| Cardiac tamponade                     | 1 (0.01%)         | 1 (0.01%)        |
| Coronary artery stenosis              | 1 (0.01%)         | 1 (0.01%)        |
| Cardiomyopathy acute                  | 1 (0.01%)         | 1 (0.01%)        |
| Palpitations                          | 1 (0.01%)         | 0                |
| Atrial flutter                        | 1 (0.01%)         | 0                |
| Atrioventricular block second degree  | 1 (0.01%)         | 0                |
| <b>Vascular disorders</b>             | <b>4 (0.04%)</b>  | <b>2 (0.02%)</b> |
| Peripheral arterial occlusive disease | 2 (0.02%)         | 1 (0.01%)        |
| Aortic dissection                     | 1 (0.01%)         | 1 (0.01%)        |
| Hypertension                          | 1 (0.01%)         | 0                |

|                                                        |                   |                   |
|--------------------------------------------------------|-------------------|-------------------|
| <b>Respiratory, thoracic and mediastinal disorders</b> | <b>7 (0.07%)</b>  | <b>5 (0.05%)</b>  |
| Cough                                                  | 2 (0.02%)         | 0                 |
| Dyspnoea                                               | 1 (0.01%)         | 1 (0.01%)         |
| Interstitial lung disease                              | 1 (0.01%)         | 1 (0.01%)         |
| Pneumothorax                                           | 1 (0.01%)         | 1 (0.01%)         |
| Pulmonary oedema                                       | 1 (0.01%)         | 1 (0.01%)         |
| Respiratory disorder                                   | 1 (0.01%)         | 1 (0.01%)         |
| Sputum retention                                       | 1 (0.01%)         | 0                 |
| <b>Gastrointestinal disorders</b>                      | <b>73 (0.68%)</b> | <b>12 (0.11%)</b> |
| Constipation                                           | 29 (0.27%)        | 0                 |
| Abdominal distension                                   | 6 (0.06%)         | 0                 |
| Nausea                                                 | 6 (0.06%)         | 0                 |
| Abdominal discomfort                                   | 5 (0.05%)         | 0                 |
| Diarrhoea                                              | 4 (0.04%)         | 0                 |
| Abdominal pain                                         | 3 (0.03%)         | 0                 |
| Abdominal pain upper                                   | 3 (0.03%)         | 0                 |
| Dyspepsia                                              | 3 (0.03%)         | 0                 |
| Gastrointestinal disorders                             | 3 (0.03%)         | 0                 |
| Ileus                                                  | 3 (0.03%)         | 3 (0.03%)         |
| Gastrooesophageal reflux disease                       | 2 (0.02%)         | 0                 |
| Gastric ulcer                                          | 1 (0.01%)         | 1 (0.01%)         |
| Gastric ulcer haemorrhage                              | 1 (0.01%)         | 1 (0.01%)         |
| Inguinal hernia                                        | 1 (0.01%)         | 1 (0.01%)         |
| Intestinal ischaemia                                   | 1 (0.01%)         | 1 (0.01%)         |
| Intestinal obstruction                                 | 1 (0.01%)         | 1 (0.01%)         |
| Large intestine perforation                            | 1 (0.01%)         | 1 (0.01%)         |
| Pancreatitis acute                                     | 1 (0.01%)         | 1 (0.01%)         |
| Large intestine polyp                                  | 1 (0.01%)         | 1 (0.01%)         |
| Oesophageal motility disorder                          | 1 (0.01%)         | 1 (0.01%)         |
| Anal haemorrhage                                       | 1 (0.01%)         | 0                 |
| Pancreatic cyst                                        | 1 (0.01%)         | 0                 |
| Flatulence                                             | 1 (0.01%)         | 0                 |
| Faeces soft                                            | 1 (0.01%)         | 0                 |
| <b>Hepatobiliary disorders</b>                         | <b>39 (0.36%)</b> | <b>9 (0.08%)</b>  |
| Hepatic function abnormal                              | 28 (0.26%)        | 3 (0.03%)         |
| Liver disorder                                         | 4 (0.04%)         | 0                 |
| Cholecystitis                                          | 2 (0.02%)         | 2 (0.02%)         |

|                                                        |                   |                  |
|--------------------------------------------------------|-------------------|------------------|
| Cholecystitis acute                                    | 2 (0.02%)         | 2 (0.02%)        |
| Cholangitis                                            | 1 (0.01%)         | 1 (0.01%)        |
| Hepatitis acute                                        | 1 (0.01%)         | 1 (0.01%)        |
| Biliary colic                                          | 1 (0.01%)         | 0                |
| <b>Skin and subcutaneous tissue disorders</b>          | <b>44 (0.41%)</b> | <b>6 (0.06%)</b> |
| Rash                                                   | 13 (0.12%)        | 1 (0.01%)        |
| Pruritus                                               | 9 (0.08%)         | 0                |
| Pemphigoid                                             | 5 (0.05%)         | 5 (0.05%)        |
| Drug eruption                                          | 4 (0.04%)         | 0                |
| Urticaria                                              | 4 (0.04%)         | 0                |
| Eczema                                                 | 2 (0.02%)         | 0                |
| Rash generalised                                       | 2 (0.02%)         | 0                |
| Alopecia areata                                        | 1 (0.01%)         | 0                |
| Dermatitis                                             | 1 (0.01%)         | 0                |
| Dermatitis allergic                                    | 1 (0.01%)         | 0                |
| Eczema asteatotic                                      | 1 (0.01%)         | 0                |
| Hyperhidrosis                                          | 1 (0.01%)         | 0                |
| Chronic pigmented purpura                              | 1 (0.01%)         | 0                |
| <b>Musculoskeletal and connective tissue disorders</b> | <b>7 (0.07%)</b>  | <b>2 (0.02%)</b> |
| Rheumatoid arthritis                                   | 2 (0.02%)         | 1 (0.01%)        |
| Myalgia                                                | 2 (0.02%)         | 0                |
| Collagen disorder                                      | 1 (0.01%)         | 1 (0.01%)        |
| Back pain                                              | 1 (0.01%)         | 0                |
| Musculoskeletal pain                                   | 1 (0.01%)         | 0                |
| Neck pain                                              | 1 (0.01%)         | 0                |
| Periarthritis                                          | 1 (0.01%)         | 0                |
| <b>Renal and urinary disorders</b>                     | <b>24 (0.22%)</b> | <b>7 (0.07%)</b> |
| Renal impairment                                       | 7 (0.07%)         | 2 (0.02%)        |
| Proteinuria                                            | 7 (0.07%)         | 0                |
| Ureterolithiasis                                       | 3 (0.03%)         | 2 (0.02%)        |
| Nephrotic syndrome                                     | 2 (0.02%)         | 2 (0.02%)        |
| Diabetic nephropathy                                   | 2 (0.02%)         | 0                |
| Acute kidney injury                                    | 1 (0.01%)         | 1 (0.01%)        |
| Hypertonic bladder                                     | 1 (0.01%)         | 1 (0.01%)        |
| Haematuria                                             | 1 (0.01%)         | 0                |
| Pollakiuria                                            | 1 (0.01%)         | 0                |
| Renal disorder                                         | 1 (0.01%)         | 0                |

|                                                             |                   |                  |
|-------------------------------------------------------------|-------------------|------------------|
| <b>Reproductive system and breast disorders</b>             | <b>1 (0.01%)</b>  | <b>0</b>         |
| Gynaecomastia                                               | 1 (0.01%)         | 0                |
| <b>Congenital, familial and genetic disorders</b>           | <b>1 (0.01%)</b>  | <b>0</b>         |
| Epidermolysis bullosa                                       | 1 (0.01%)         | 0                |
| <b>General disorders and administration site conditions</b> | <b>24 (0.22%)</b> | <b>6 (0.06%)</b> |
| Feeling abnormal                                            | 5 (0.05%)         | 0                |
| Malaise                                                     | 5 (0.05%)         | 0                |
| Death                                                       | 4 (0.04%)         | 4 (0.04%)        |
| Oedema peripheral                                           | 3 (0.03%)         | 0                |
| Pyrexia                                                     | 2 (0.02%)         | 1 (0.01%)        |
| Multiple organ dysfunction syndrome                         | 1 (0.01%)         | 1 (0.01%)        |
| Asthenia                                                    | 1 (0.01%)         | 0                |
| Feeling hot                                                 | 1 (0.01%)         | 0                |
| Hunger                                                      | 1 (0.01%)         | 0                |
| Oedema                                                      | 1 (0.01%)         | 0                |
| Physical deconditioning                                     | 1 (0.01%)         | 0                |
| <b>Investigations</b>                                       | <b>64 (0.60%)</b> | <b>5 (0.05%)</b> |
| Blood glucose decreased                                     | 9 (0.08%)         | 1 (0.01%)        |
| Aspartate aminotransferase increased                        | 8 (0.07%)         | 0                |
| Blood creatinine increased                                  | 7 (0.07%)         | 1 (0.01%)        |
| Alanine aminotransferase increased                          | 7 (0.07%)         | 0                |
| Blood triglycerides increased                               | 4 (0.04%)         | 1 (0.01%)        |
| Blood glucose increased                                     | 3 (0.03%)         | 1 (0.01%)        |
| Amylase increased                                           | 3 (0.03%)         | 0                |
| Blood creatine phosphokinase increased                      | 3 (0.03%)         | 0                |
| Protein urine present                                       | 3 (0.03%)         | 0                |
| Hepatic enzyme increased                                    | 3 (0.03%)         | 0                |
| Platelet count decreased                                    | 2 (0.02%)         | 1 (0.01%)        |
| Blood bilirubin increased                                   | 2 (0.02%)         | 0                |
| Blood pressure increased                                    | 2 (0.02%)         | 0                |
| Blood urea increased                                        | 2 (0.02%)         | 0                |
| Heart rate increased                                        | 2 (0.02%)         | 0                |
| Blood pressure systolic increased                           | 1 (0.01%)         | 0                |
| Electrocardiogram abnormal                                  | 1 (0.01%)         | 0                |
| Electrocardiogram QT prolonged                              | 1 (0.01%)         | 0                |
| Electrocardiogram T wave inversion                          | 1 (0.01%)         | 0                |
| Glycosylated haemoglobin increased                          | 1 (0.01%)         | 0                |

|                                                       |                  |                  |
|-------------------------------------------------------|------------------|------------------|
| High density lipoprotein decreased                    | 1 (0.01%)        | 0                |
| Lipids abnormal                                       | 1 (0.01%)        | 0                |
| Weight increased                                      | 1 (0.01%)        | 0                |
| White blood cell count decreased                      | 1 (0.01%)        | 0                |
| Blood elastase increased                              | 1 (0.01%)        | 0                |
| Electrocardiogram Q wave abnormal                     | 1 (0.01%)        | 0                |
| Blood alkaline phosphatase decreased                  | 1 (0.01%)        | 0                |
| Electrocardiogram ST-T change                         | 1 (0.01%)        | 0                |
| Liver function test increased                         | 1 (0.01%)        | 0                |
| <b>Injury, poisoning and procedural complications</b> | <b>1 (0.01%)</b> | <b>1 (0.01%)</b> |
| Femur fracture                                        | 1 (0.01%)        | 1 (0.01%)        |
| <b>Surgical and medical procedures</b>                | <b>1 (0.01%)</b> | <b>1 (0.01%)</b> |
| Haemodialysis                                         | 1 (0.01%)        | 1 (0.01%)        |

Values are number (%) of patients.

ADRs were defined as adverse events for which a causal relationship with teneligliptin could not be excluded, i.e., causal or unknown.

ADR, adverse drug reaction



**Supplemental Table 6.** Outcomes of ADRs and AEs of special interest

| Category of ADR/AE                           | Number of patients | Recovered | Recovering | Not recovered | Recovered with sequelae | Death | Unknown |
|----------------------------------------------|--------------------|-----------|------------|---------------|-------------------------|-------|---------|
| Hypoglycaemia-related ADRs                   | 38                 | 32        | 6          | 0             | 0                       | 0     | 0       |
| Skin and subcutaneous tissue disorders, ADRs | 45                 | 35        | 9          | 0             | 0                       | 0     | 1       |
| Gastrointestinal disorders, ADRs             | 80                 | 49        | 24         | 3             | 0                       | 2     | 2       |
| Hepatic impairment, ADRs                     | 54                 | 25        | 13         | 12            | 0                       | 1     | 3       |
| Renal impairment, ADRs                       | 37                 | 15        | 8          | 12            | 0                       | 0     | 2       |
| Cardiovascular events, AEs                   | 85                 | 18        | 25         | 6             | 13                      | 16    | 7       |
| Cardiovascular events, ADRs                  | 18                 | 6         | 4          | 2             | 3                       | 2     | 1       |
| Malignant tumours, AEs                       | 116                | 20        | 23         | 11            | 3                       | 43    | 16      |
| Malignant tumours, ADRs                      | 28                 | 7         | 9          | 1             | 1                       | 5     | 5       |

Values are number of patients

ADR, adverse drug reaction; AE, adverse event

**Supplemental Table 7.** Changes in body weight and lipids over time

|                      |                | 0 months      | 6 months      | 12 months     | 24 months     | 36 months     | Last visit    |
|----------------------|----------------|---------------|---------------|---------------|---------------|---------------|---------------|
| <b>Body weight</b>   | N              | 6,401         | 4,881         | 4,296         | 3,600         | 3,039         | 6,401         |
|                      | Value (kg)     | 65.46 ± 14.28 | 65.15 ± 14.29 | 65.06 ± 14.00 | 64.87 ± 13.61 | 64.80 ± 13.56 | 64.72 ± 14.15 |
|                      | Change (kg)    | –             | –0.37 ± 3.60  | –0.24 ± 3.54  | –0.49 ± 3.98  | –0.86 ± 4.37  | –0.73 ± 4.60  |
|                      | p-value*       | –             | <0.001        | <0.001        | <0.001        | <0.001        | <0.001        |
| <b>Triglycerides</b> | N              | 7,351         | 5,672         | 5,014         | 4,093         | 3,377         | 7,351         |
|                      | Value (mg/dL)  | 164.1 ± 126.2 | 151.7 ± 100.7 | 147.2 ± 93.9  | 148.7 ± 95.8  | 146.6 ± 87.5  | 151.6 ± 102.7 |
|                      | Change (mg/dL) | –             | –11.3 ± 109.6 | –13.5 ± 106.7 | –13.0 ± 114.9 | –15.1 ± 112.0 | –12.5 ± 117.2 |
|                      | p-value*       | –             | <0.001        | <0.001        | <0.001        | <0.001        | <0.001        |
| <b>HDL-C</b>         | N              | 6,907         | 5,304         | 4,659         | 3,782         | 3,114         | 6,907         |
|                      | Value (mg/dL)  | 53.5 ± 16.0   | 53.1 ± 15.4   | 54.2 ± 16.6   | 53.9 ± 14.8   | 54.3 ± 14.9   | 53.6 ± 15.6   |
|                      | Change (mg/dL) | –             | –0.4 ± 12.5   | 0.5 ± 13.2    | 0.1 ± 12.1    | 0.3 ± 13.4    | 0.1 ± 12.6    |
|                      | p-value*       | –             | 0.024         | 0.015         | 0.693         | 0.211         | 0.387         |
| <b>LDL-C</b>         | N              | 6,553         | 4,973         | 4,422         | 3,632         | 3,009         | 6,553         |
|                      | Value (mg/dL)  | 113.7 ± 32.1  | 107.1 ± 28.8  | 106.7 ± 28.9  | 106.2 ± 28.3  | 105.9 ± 36.7  | 107.0 ± 33.6  |
|                      | Change (mg/dL) | –             | –6.2 ± 28.2   | –6.3 ± 29.0   | –6.4 ± 29.1   | –6.8 ± 39.3   | –6.7 ± 35.3   |
|                      | p-value*       | –             | <0.001        | <0.001        | <0.001        | <0.001        | <0.001        |

Values are means ± standard deviation

HDL-C, high-density lipoprotein cholesterol; LDL-C, low-density lipoprotein cholesterol

\*p-value was estimated by paired *t*-test
