# Supplementary material for: Long-Term, Real-World Safety and Efficacy of Teneligliptin: A Post-Marketing Surveillance of More Than 10,000 Patients with Type 2 Diabetes in Japan
Source: PubMed Central journal article supplement — Adv Ther. 2019 Dec 23;37(3):1065–86. doi: 10.1007/s12325-019-01189-w (PMC7089720; doi:10.1007/s12325-019-01189-w), 2019-12-23
Supplement: 12325_2019_1189_MOESM2_ESM.pdf [file 12325_2019_1189_MOESM2_ESM.pdf]

# Long-term, real-world safety and efficacy of teneligliptin: a post-marketing surveillance of more than 10,000 patients with type 2 diabetes in Japan

## 実臨床での長期投与におけるテネリグリプチンの安全性と有効性：日本における1万例を超える2型糖尿病患者に対する市販後調査

Takashi Kadowaki, Masakazu Haneda, Hiroshi Ito, Kazuyo Sasaki, Miyuki Matsukawa, Yuka Yamada

### 抄録

**緒言：**テネリグリプチンは、日本では2型糖尿病（T2DM）の治療薬として2012年に承認された、ジペプチジルペプチダーゼ-4阻害薬である。日本におけるテネリグリプチンの安全性と有効性に関する実臨床のエビデンスを収集する目的で、長期の市販後調査「RUBY」を実施した。

**方法：**3年間の追跡調査であるRUBYにおいて、2013年5月から2015年2月までの期間に日本でテネリグリプチンの投与を開始したT2DM患者を登録し、患者背景、治療内容、副作用（ADR）、臨床検査値などのデータを収集した。データの評価は、全患者について、また、ベースラインの推算糸球体濾過量に基づく腎機能区分（G1～G5）別および透析例について行った。最長で3年間にわたり、安全性をADRの発現割合にて、有効性を血糖コントロール状態にて評価した。

**結果：**登録患者11,677例のうち、安全性は10,696例、有効性は10,249例にて解析評価が可能であった。投与期間の中央値は1,096日であった。ADRは412例（3.85%）に発現し、うち117例（1.09%）が重篤であった。最も頻度が高かったADRは便秘などの胃腸障害（0.68%）であった。テネリグリプチンの添付文書にすでに記載されているもの以外に、注意を要する新

たな ADR の発現はなかった。腎機能サブグループ別の ADR および重篤な ADR の発現割合は、G1～G5 群でそれぞれ 3.24～7.14% および 0.65～5.36%、透析例でそれぞれ 4.49% および 1.92% であった。HbA1c 値の低下は、テネリグリプチンの投与開始から 3 年間にわたって持続した（3 年時：-0.70%±1.36%， $p < 0.001$ ）。ベースライン値で調整した HbA1c 値の 3 年時の変化量（最小二乗平均）は、G1～G5 群で -0.76%～-0.66% であった。透析例ではグリコアルブミン値が低下した（3 年時：-2.92%±4.78%）。

**結論：**腎機能障害の程度にかかわらず、T2DM 患者への実臨床でのテネリグリプチンの長期投与において、安全性または有効性に関する新たな懸念は認められなかった。

**キーワード：**テネリグリプチン、実臨床、市販後調査、2 型糖尿病、腎機能障害、ジペプチジルペプチダーゼ-4 阻害薬

### 平易な言葉による要約

テネリグリプチンは、2 型糖尿病の治療のために 1 日 1 回経口投与するジペプチジルペプチダーゼ-4 阻害薬である。テネリグリプチンの安全性と有効性は数多くの臨床試験で評価されているが、それらには患者の人数、患者背景、試験期間などに制約があった。そこで、実臨床における 2 型糖尿病患者に対するテネリグリプチンの長期的な安全性と有効性を検討するために、10,000 例を超える日本の患者を対象として、3 年間にわたる市販後調査を実施した。患者は、推算糸球体濾過量に基づく腎機能区分群（重症度が最も低いグレード 1 から最も高いグレード 5 まで）および透析患者に分類した。副作用は 10,696 例中、3.85% の患者にみられ、便秘などの胃腸障害（0.68%）が最も高い頻度でみられた。テネリグリプチンの情報リーフレットや添付文書にすでに記載されているもの以外に、注意を要する新たな副作用はみられなかった。腎機能障害の程度別では、グレード 1～5 の患者の 3.24～7.14%、透析患者の 4.49% で副作用が

みられた。また、テネリグリプチン投与により、血糖コントロールの指標であるヘモグロビン A1c 値の低下が認められ、調査対象集団全体では 3 年時に 0.70% の低下、腎機能障害の程度別でも各グループで同様の低下が認められた。透析患者ではグリコアルブミンが減少した。これらの知見は、慢性腎臓病患者や透析中の患者も含めた実臨床での 2 型糖尿病患者に対するテネリグリプチンの長期投与において、安全性・有効性上の新たな懸念が認められなかったことを示している。

## 緒言

2 型糖尿病 (T2DM) が社会にもたらす影響は、世界的にも [1] 日本においても [2] 急速に拡大しつつある。2016 年の日本の国民健康・栄養調査によると、糖尿病が強く疑われる成人は推定 1 千万人にのぼっており、さらに 1 千万人が糖尿病の可能性を否定できないと報告されている [2]。T2DM 患者には併存症や糖尿病合併症 (特に糖尿病腎症) も高い割合で認められる。糖尿病腎症は、透析導入患者における腎不全の原因疾患として最も多い [3]。糖尿病合併症のリスクを低減することを目的として、糖尿病管理ガイドラインは血糖コントロールの目標値を設定している [4-6]。腎機能障害は薬物の排泄にも影響を与えるおそれがあるので、腎排泄型薬剤は減量が必要になることがあり、腎機能障害患者に対する投与を禁忌としている薬剤 (特にメトホルミンなど) もある [7]。また、腎機能障害はインスリンのクリアランスを低下させ、腎での糖新生を阻害して低血糖のリスクを上昇させる [8]。

ジペプチジルペプチダーゼ-4 (DPP-4) 阻害薬は T2DM の治療に広く用いられており、日本では約 60% の患者で第一選択薬として投与されている [9]。そのように、日本で DPP-4 阻害薬の使用率が高い理由として、アジア人患者に特有の T2DM の病態生理、すなわち、アジア人以外に比べて  $\beta$  細胞機能が低い、インスリン抵抗性が少ない、食生活の違いや遺伝的素因などが

挙げられる [10,11] . これらの因子すべてが、日本人を含めたアジアの患者集団では DPP-4 阻害薬の効果が高いことに寄与していると考えられる [12] .

DPP-4 阻害薬テネリグリプチンは、日本では 2012 年、韓国では 2014 年に承認された [13] . 単独療法 [14,15] , ならびに経口血糖降下薬またはインスリンとの併用療法 [16-22] について検討した臨床試験において、テネリグリプチンの有効性と安全性が示されている。日本での用量は 20 mg 1 日 1 回であり、承認されているとおり [23] , 処方医が患者の血糖コントロールが不十分と判断した場合は、経過を十分に観察しながら 40 mg 1 日 1 回に増量することができる。テネリグリプチンは、複数経路（チトクロム P450 3A4 およびフラビン含有モノオキシゲナーゼ 3 による肝代謝、または未変化体の腎排泄）で排泄される独特の薬物動態プロファイルを示すため、透析例を含めた腎機能障害のある T2DM 患者においては用量調節は不要である [13] .

臨床試験ではしばしば試験期間、症例数、患者背景（腎機能障害を含む）などが限られる。したがって、薬剤の市販後調査により実臨床で治療されたより多数の患者からのデータを蓄積することで、新たに承認された医薬品の安全性および有効性に関する追加情報を得ることができる。

このような背景のもと、テネリグリプチンの実臨床における長期使用例（3 年間）での安全性および有効性の検討を目的として 10,000 例を超える T2DM 患者を対象とした市販後調査

「RUBY ; ExploRing the long-term efficacy and safety including cardiovascular events in patients with type 2 diabetes treated by teneligliptin in the real-world」が、日本で実施された [24-26] . 本報では「RUBY」におけるテネリグリプチンの 3 年間長期投与の安全性および有

効性を報告する。さらに、腎機能別および透析患者における安全性および有効性も検討した。

## 方法

### 倫理

調査プロトコルは日本の厚生労働省に承認され、調査は田辺三菱製薬株式会社が「医薬品の製造販売後の調査及び試験の実施の基準（GPSP）に関する省令」を遵守して実施した。調査では、日本の日常診療で収集され、匿名化したデータを使用した。市販後調査に関する日本の規定では、患者同意は必須ではない。「RUBY」は日本医薬情報センターの臨床試験情報データベースに登録された（Japic CTI-153047）。

### 患者および調査デザイン

2013年5月から2015年2月までの期間にテネリグリプチンを初めて投与されたT2DM患者が、処方医によって「RUBY」に登録された。登録患者は2018年8月まで、最長3年間にわたり追跡した。すべてのデータは電子症例報告書に記録し、2019年1月にデータを固定した。すべての治療は、テネリグリプチンの投与、他の糖尿病治療薬の併用や併存症の治療を含め、添付文書やレジメンに則り処方医の判断で行われた。20 mgでは効果不十分と処方医が判断した場合は、テネリグリプチンを40 mg 1日1回に増量可とした。

処方医は、電子症例報告書を用いてベースラインの患者背景、併存症、腎機能、治療状況、臨床検査値、および副作用（ADR）・有害事象（AE）を記録し、登録から3年後までのデータを収集した。臨床検査値データにはヘモグロビンA1c（HbA1c）、空腹時血糖（FBG）および脂質が含まれ、これらはテネリグリプチン投与開始前、投与後3、6、12、18、24、30および36ヵ月時に記録された。臨床検査は、調査に参加した医療機関で通常用いられる方法で行われ

た。推算糸球体濾過量（eGFR）は、症例報告書に記録された年齢、性別および血清クレアチニン値をもとに、日本の eGFR 計算式により算出した [27]。透析例ではグリコアルブミンを記録した。

最長で3年間にわたり、安全性を ADR の発現割合で、有効性を血糖コントロールで評価した。すべての ADR は ICH 国際医薬用語集日本語版（MedDRA/J）version 21.1 を用いて分類した。ADR の定義は、処方医または田辺三菱製薬株式会社のいずれかまたは両方が、テネリグリプチンとの因果関係が否定できない AE、すなわち因果関係ありまたは因果関係不明と判定した AE とした。重篤な ADR と AE は以下の定義により判定した：死亡、生命を脅かすもの、入院または入院期間の延長を要するもの、永続的または顕著な障害／機能不全に陥るもの、先天異常または先天性欠損を来すもの、医学的に重要な事象または反応。本調査における重篤な低血糖は、血糖値 $\leq$ 50 mg/dL または処方医の診断によるものと定義した。注目すべき ADR には低血糖関連 ADR、皮膚および皮下組織障害（類天疱瘡を含む）、胃腸障害（膵炎および腸閉塞を含む）、肝機能障害、腎機能障害、心血管系イベント、悪性腫瘍を含めた。加えて、心血管系イベントおよび腫瘍に関連する AE の頻度も評価した。これらの注目すべき ADR および AE は、MedDRA の基本語（PT）と器官別大分類（SOC）または MedDRA 標準検索式（SMQ）を用いて定義した。心血管系イベントは「心筋梗塞」、 「中枢神経系出血および脳血管性疾患」の2つの広域 SMQ により定義した。

安全性および有効性の解析は、全患者集団およびベースラインの腎機能別で行った。腎機能障害の程度による層別解析では、患者をテネリグリプチン開始時に透析を受けていた患者と受けていなかった患者に分けた。ベースラインの eGFR 値がある非透析例については、慢性腎臓病（CKD）の eGFR 区分に従い、患者の腎機能により以下のとおり分類した [28]：G1, eGFR

≥90 mL/min/1.73 m<sup>2</sup> ; G2, eGFR 60~<90 mL/min/1.73 m<sup>2</sup> ; G3a, eGFR 45~<60 mL/min/1.73 m<sup>2</sup> ; G3b, eGFR 30~<45 mL/min/1.73 m<sup>2</sup> ; G4, eGFR 15~<30 mL/min/1.73 m<sup>2</sup> ; G5, eGFR<15 mL/min/1.73 m<sup>2</sup>. 観察期間中に患者が透析を開始した場合は、透析開始前までのデータを用いて、HbA1c と eGFR を評価した。

また、テネリグリプチンを 40 mg に増量した場合の安全性と有効性も検討した。有効性の解析では、40 mg 1 日 1 回を 8 週間以上投与され、観察期間中の増量前後に HbA1c 値が測定された患者を対象とした。

本調査のデザインの詳細は中間解析報告書に記述されている [24,25] .

## 統計解析

すべての統計解析には SAS 統計ソフトウェアのバージョン 9.1.3 以上を使用した。データの解析には安全性解析集団と有効性解析集団を用いた。安全性解析集団は安全性を評価されたすべての登録患者とし、有効性解析集団は有効性を評価された全患者とした。本解析では観察期間中の糖尿病治療に関する併用薬の変更および生活習慣の変化は考慮しなかった。カテゴリカル変数は頻度およびパーセンテージ、連続変数は記述統計量として提示した。注目すべき ADR または AE について、発現割合のリスク比および 95%信頼区間 (CI) を eGFR 区別に算出し、発現割合の均一性を評価した。連続変数のベースラインからの変化については、eGFR 以外は対応のある *t* 検定、eGFR は Wilcoxon の符号付き順位検定を用いて評価した。すべての検定は有意水準を両側 5%とした。各時点における HbA1c 値のベースラインからの変化量の最小二乗 (LS) 平均値および標準誤差 (SE) を求め、ベースラインの HbA1c 値を共変量とした共分散分析 (ANCOVA) により eGFR 区分間の差について有意差検定を行った。欠測データは、

各時点での処理は行わず、最終時点において last observation carried forward (LOCF) 法により補完した。

## 結果

### 患者

全体で 11,677 例が 1,755 施設から「RUBY」に登録され、うち 11,355 例の調査票が収集された。このうち 10,696 例が安全性解析対象症例、10,249 例が有効性解析対象症例となった

(Figure 1)。3,680 例 (34.4%) が、以下の理由 (複数回答可) で治療開始後 3 年に至る前に投与中止あるいは脱落となった: 来院せず (1,208 例, 32.8%), 転院 (915 例, 24.9%), 医師が治療効果不十分と判断 (604 例, 16.4%), AE/ADR (308 例, 8.4%), 治療を中止できるまでに 2 型糖尿病の症状が改善または回復 (270 例, 7.3%), その他 (481 例, 13.1%)。

投与期間の中央値は 1,096 日 (25~75 パーセンタイル: 500~1,096 日)。処方医の判断によりテネリグリプチンを 20 mg から 40 mg へ増量した患者は 220 例 (2.1%)、投与開始から増量までの期間 (中央値) は 183.5 日、増量期間 (中央値) は 597 日であった。

安全性解析対象集団のベースライン時の患者背景要約を Table 1 に示す。年齢、T2DM の罹病期間および BMI (平均±標準偏差 [SD]) はそれぞれ 65.4±12.4 歳、7.41±7.87 年、25.24±4.40 kg/m<sup>2</sup> であった。テネリグリプチン開始時の HbA1c 値および空腹時血糖 (FBG) (平均±SD) はそれぞれ 7.75±1.53%、151.7±52.4 mg/dL であった。ベースライン時に食事療法中および運動療法中の患者の割合はそれぞれ 76.1%、58.8% であった。患者の約 4 分の 1 が糖尿病合併症、約 3 分の 2 がその他の併存症 (高血圧、脂質異常症) を有していた。

テネリグリプチンの単独療法は 5,126 例 (47.9%) であった。併用療法において観察期間中に



最も多く用いられた併用薬はスルホニルウレア薬（2,685例，25.1%）とビグアナイド薬（2,294例，21.4%）であった。（**Supplemental Table 1**）。スルホニルウレア薬を併用した患者のほとんどは推奨用量（グリメピリド  $\leq 2.0$  mg，グリクラジド  $\leq 40$  mg およびグリベンクラミド  $\leq 1.25$  mg） [29] を遵守しており，遵守率はグリメピリド 84.7%（1,984例中 1,680例），グリクラジド 81.8%（225例中 184例），グリベンクラミド 25.0%（140例中 35例）であった。**Supplemental Table 1** に示すとおり，併用薬の割合は，この期間中に上市されたナトリウム・グルコース共輸送体 2 阻害薬の併用例が増加したことを除き，テネリグリプチンの投与開始から 3 年間に顕著な変化はなかった。観察期間中に高血圧治療薬が 5,372 例（50.2%），脂質異常症治療薬が 4,436 例（41.5%）に投与された。

安全性解析対象集団 10,696 例中，ベースライン時の eGFR が算出可能であった非透析例は 9,382 例で，腎機能の区分では G1 が 2,008 例，G2 が 5,015 例，G3a が 1,525 例，G3b が 561 例，G4 が 217 例，G5 が 56 例であった。また，156 例はベースライン時に透析を受けていた。以上の 7 群の患者背景を **Supplemental Table 2** に示す。注目すべき所見として，CKD のグレードが高い患者ほど T2DM 罹病期間は長く，糖尿病合併症やその他の併存症の有病率が高い傾向が認められた。テネリグリプチンを 40 mg へ増量した患者のうち，eGFR < 45 mL/min/1.73 m<sup>2</sup> または透析中の患者は計 41 例であり，増量期間の中央値は G3b で 475 日，G4 で 907 日，G5 で 338 日，透析例で 149 日であった。15 例が観察期間中に透析を開始した。**Supplemental Table 3** に T2DM，高血圧，脂質異常症の治療薬ならびに赤血球造血刺激因子製剤の併用状況を示す。

## 安全性

### 全集団

10,696 例中、ADR は 412 例 (3.85%) に計 489 件が発現し、重篤な ADR は 117 例 (1.09%) に 133 件が認められた。全集団における注目すべき ADR と、心血管系イベントおよび悪性腫瘍の AE の一覧を **Table 2** および **Supplemental Table 4** に示す。ADR の器官別大分類および基本語別の一覧を **Supplemental Table 5** に示す。注目すべき ADR で最も頻度が高かったものは胃腸障害 (0.68%) で、内訳は便秘 (0.27%)、腸閉塞 (イレウス含む) (0.04%)、膵炎 (0.01%) などであった。低血糖関連 ADR は 38 例 (0.36%) に発現し、そのうち 8 例 (0.07%) は重篤な ADR と判定された。8 例全例がスルホニルウレア薬またはインスリンを使用していた。テネリグリプチン単剤療法例では重篤な低血糖の発現はみられなかったが、非重篤な低血糖が 9 例で報告された。皮膚および皮下組織障害は 44 例 (0.41%) に発現した。類天疱瘡は 5 例 (0.05%) で報告され、いずれも重篤と判定された。転帰が不明な 1 例を除き、類天疱瘡はテネリグリプチンの中止またはコルチコステロイドの投与後に回復または軽快した。類天疱瘡が認められた 5 例中、4 例は 75 歳以上で、テネリグリプチンの投与開始から事象発現までの期間は 11 カ月以上であった。肝機能障害は 0.44%、腎機能障害は 0.32%の患者に発現した。心血管系イベントは AE として 85 例 (0.79%)、ADR として 18 例 (0.17%) が報告され、そのうち 14 例 (0.13%) が重篤な ADR であった。悪性腫瘍は AE として 111 例 (1.04%)、ADR として 27 例 (0.25%) が報告された。ADR として報告された悪性腫瘍はすべて重篤と判定された。最も頻度が高かった悪性腫瘍は膵癌で、AE として 15 例 (0.14% ; 100 人年あたり 0.06)、ADR として 5 例 (0.05% ; 100 人年あたり 0.02) が報告された。注目すべき ADR 以外で患者の 0.1%以上に発現した ADR として、11 例 (0.10%) に浮動性めまいが認められたが、いずれも重篤ではなかった。死亡は 6 例報告され、テネリグリプチンとの因果関係は 4 例が不明、2 例は因果関係なしと判定された。**Supplemental Table 6** に注目すべき ADR および AE の転帰を示す。

40 mg に増量した 220 例中、ADR は 13 例 (5.91%) で 16 件、重篤な ADR は 3 例 (1.36%) で 4 件認められた。ADR の 16 件中 12 件については、テネリグリプチンとの因果関係は不明と報告された。ADR13 例の内訳は、肝機能異常が 2 例、膵癌、肺の悪性新生物、貧血、糖尿病、アルツハイマー型認知症、心房粗動、便秘、肝機能検査値上昇、円形脱毛症、類天疱瘡、筋肉痛、女性化乳房、アラニンアミノトランスフェラーゼ増加、アスパラギン酸アミノトランスフェラーゼ増加が各 1 例であった。重篤な ADR は肝機能異常、膵癌、肺の悪性新生物、類天疱瘡であった。

ベースラインから 3 年時までには、体重、中性脂肪および LDL-コレステロールは、わずかではあるが有意な変化が認められた (体重 :  $-0.86 \pm 4.37$  kg, 3,039 例,  $p < 0.001$ , 中性脂肪 :  $-15.1 \pm 112.0$  mg/dL, 3,377 例,  $p < 0.001$ , LDL-コレステロール :  $-6.8 \pm 39.3$  mg/dL, 3,009 例,  $p < 0.001$ ) (Supplemental Table 7)。また、HDL-コレステロールについては、有意ではない変化であった ( $0.3 \pm 13.4$  mg/dL, 3,114 例,  $p = 0.211$ )。

#### 腎機能による層別解析

すべての ADR と重篤な ADR の発現割合は、G1 群と比較して、G4 および G5 群で多い傾向があった (Table 3)。透析例では ADR が 4.49%、重篤な ADR が 1.92% に発現した。G4 および G5 群で報告された 19 例 29 件の ADR に関する処方医の判断は、テネリグリプチンとの因果関係がおそらくありと考えられるものが 7 件、不明が 22 件、他の原因 (併存症や併用薬など) が 15 件であった。注目すべき ADR については、腎機能障害を除き、発現割合に eGFR 区分間で有意差は認められなかった。腎機能障害に関連する ADR の発現割合は、G1 群と比較して G4 および G5 群で高い傾向にあった。G4 および G5 群の 5 例で腎機能障害に関する ADR が報告された (血中クレアチニン増加、低アルブミン血症、低ナトリウム血症、腎機能障害、血液

透析)。腎機能障害が進行した患者 (eGFR<45 mL/min/1.73 m<sup>2</sup> [G3b~G5] または透析例) のうち 6 例で低血糖が発現し, うち 2 例は重篤な低血糖であった。ベースライン時に eGFR<45 mL/min/1.73 m<sup>2</sup> または透析中の患者で, テネリグリプチンを 20 mg から 40 mg へ増量した 41 例のうち, 2 例に ADR (肝機能異常, アルツハイマー型認知症) が発現した。Figure 2 に示すように, G1, G2 群では 6 カ月時に eGFR の中央値が低下し, その後は維持された。G3a~G5 群では明らかな変化はみられなかった。

## 有効性

### 全集団

Figure 3 に示すように, HbA1c 値および FBG はともにベースラインから 6~36 カ月にわたって有意に低下し, 3 年時の低下量は HbA1c 値では $-0.70\pm 1.36\%$  (5,027 例,  $p<0.001$ ), FBG では $-19.8\pm 48.2$  mg/dL (1,096 例,  $p<0.001$ ) であった。ベースラインの HbA1c 値が 7.0%以上で, かつ 3 年時点の HbA1c 値のデータを有する患者において, 3 年時点で HbA1c 値<7%を達成した患者は 46.9% (3,440 例中 1,612 例) であった。観察期間中にテネリグリプチンを 20 mg から 40 mg に増量した患者における HbA1c 値は, ベースラインで $8.26\pm 1.95\%$  (152 例), 増量時点で $7.88\pm 1.42\%$  (160 例), 増量期間中の最終来院時では $7.56\pm 1.40\%$  (160 例) であった。ベースラインから増量期間中の最終来院までの平均変化量は $-0.69\pm 1.91\%$  (152 例), 増量時点からの平均変化量は $-0.33\pm 1.39\%$  (160 例) であった。

### 腎機能による層別解析

Figure 4 に示すように, HbA1c 値は G1~G4 群で 3 年間にわたって有意に低下した。G5 群では, 投与 1 年以降は有意ではなかったものの, HbA1c 値は低下あるいは低下傾向を示した。ベースライン時の HbA1c 値の差を調整するため, 各群で HbA1c 値変化量の LS 平均値を算出し

た。その結果、3年時における HbA1c 値の変化量 (LS 平均値) は G1~G5 群で-0.76%から-0.66%の範囲であり、6 群間で HbA1c 値の変化量に有意差はなかった ( $p=0.333$ , **Figure 4A**)。透析例では、ベースラインから3年時までにはグリコアルブミンが  $2.92\pm 4.78\%$  の有意な低下を示した (41 例,  $p<0.001$ ; **Figure 4B**)。

## 考察

「RUBY」市販後調査は、日本における日常診療の使用実態下で、T2DM 患者に対してテネリグリプチンを長期間使用した際の安全性と有効性に関するデータを集積することを目的としてデザインされた。他の DPP-4 阻害薬では、これまでにリナグリプチン [30,31]、シタグリプチン [32-34]、ビルダグリプチン [35]、オマリグリプチン [36]、アナグリプチン

[37,38] などの市販後調査や観察研究が報告されている。これらの報告のほとんどは登録患者が数千例であり、一部は中間解析結果であった。本報告では、最長で3年間テネリグリプチンを投与された 10,000 例を超える患者の安全性および有効性データを解析した。

## 全集団における安全性

本調査において、テネリグリプチン治療例における ADR の発現割合は、すべての ADR が 3.85%、重篤な ADR が 1.09%であった。ADR の発現割合が、日本国内の臨床試験での発現割合 (1,645 例中の 9.48%) [23]、あるいは臨床試験での1年間の観察結果 (6.7%~18.9%)

[13] を上回っていなかった点は特記される。本調査で得られたテネリグリプチンの安全性プロファイルは、他の DPP-4 阻害薬で報告されているもの [30-36] とおおむね類似していた。

最も発現割合が高かった ADR は胃腸障害 (0.68%) であったが、ほとんどの患者は回復または軽快であった。腸閉塞 (イレウス) は 4 例 (0.04%) 報告されたが、テネリグリプチンの臨床

試験で報告された発現割合（0.1%）は超えなかった [23]。しかしながら、テネリグリプチンの添付文書 [23] の腸閉塞の項に記載のとおり、高度の便秘、腹部膨満、持続する腹痛、嘔吐などの異常が認められた場合はテネリグリプチンの投与を中止し、適切な処置を行うべきである。

低血糖関連 ADR は 0.36%の患者に発現した。重篤な低血糖を発現した患者は、全員、低血糖のリスクが高まると考えられるインスリンまたはスルホニルウレア薬を併用していた。したがって、これらの糖尿病治療薬と DPP-4 阻害薬を併用する場合は、低血糖を避けるために慎重な管理が必要である。

肝機能障害に関連する ADR の発現割合は 0.44%であった。DPP-4 阻害薬による肝機能障害のリスクは、テネリグリプチンの販売開始後に日本の医薬品医療機器総合機構（PMDA）によって指摘された。テネリグリプチンの添付文書は他の DPP-4 阻害薬と同様に、2014 年に改訂され、すでに注意喚起がなされている [23]。

本調査における皮膚および皮下組織障害の ADR 発現割合は 0.41%であった。観察期間中に、テネリグリプチンを含む DPP-4 阻害薬との関連が疑われる新たな ADR [39-42] として、類天疱瘡がテネリグリプチンの添付文書に追加された [23]。本調査では ADR として類天疱瘡が 5 例（0.05%）で報告された。この発現割合は、過去に他の DPP-4 阻害薬で実施された 9,304 例を対象とする日本国内の単一施設試験における発現割合 0.0859%とほぼ同程度である [43]。その他の研究では、後天性表皮水疱症を含めた類天疱瘡のリスクが高齢者 [44] や HLA-DQB1\*03:01 遺伝子型保有者 [45] で増加することが示されている。これら既存の報告のとおり、「RUBY」での類天疱瘡発症例も多くは高齢患者であった。添付文書 [23] に記載されて

いるとおり、テネリグリプチンの投与中に水疱、びらん等があらわれた場合には、処方医は皮膚科医と相談し、適切な処置を行うことが重要である。

本調査において、心血管系イベントはAEとして85例（0.79%；100人年あたり0.33）、ADRとして18例（0.17%）が報告された。日本のJ-DOIT3（Japan Diabetes Optimal Integrated Treatment study for 3 major risk factors of cardiovascular diseases）試験 [46] では観察期間中央値8.5年の追跡により、従来治療群1,271例中97例に心血管系イベントが認められ、冠動脈イベントは4.3%、脳血管イベントは3.3%の患者に発現した。一方、観察研究であるJapan Diabetes Complications Study [47] では、心血管系合併症の既往歴がないT2DM患者1,771例において、観察期間中央値7.86年における、冠動脈性心疾患、脳卒中、心筋梗塞、脳梗塞の発現率はそれぞれ1,000人年あたり、9.59、7.45、3.84、6.29であった。心血管系イベントの定義が異なるので直接比較はできないが、これら先行研究の結果は、本調査における心血管関連AEの発現割合が、日本のT2DM患者で予想される割合の範囲内（もしくはそれ未満）であることを示唆している。

「RUBY」では膵癌が15例報告された。日本において糖尿病は膵癌リスクの増加と関連することがプール解析により示されている（HR 1.85, 95% CI 1.46–2.34） [48]。日本の一般集団における膵癌の有病率 [49] をもとに、年齢、糖尿病 [48, 50] および観察期間で調整した

「RUBY」における膵癌の期待罹患数は25.62であり、標準化罹患比（期待罹患数に対する観察罹患数の比）は0.59（95% CI 0.34–0.99）であった。したがって、テネリグリプチンの投与により膵癌のリスクが増大することはないと考えられる。

浮動性めまいは、本調査では事前に注目すべきADRとして定義していなかったが、0.1%の患

者に発現した。この発現割合は、最長1年間の臨床試験で示された0.1%と同じである

[23]。このことは、実臨床下でテネリグリプチンが投与された患者において浮動性めまいの発現が増加することはないことを示唆している。

体重についても、テネリグリプチン投与後に有意な変化が観察されたが、これは実臨床ではわずかな変化と思われる。DPP-4阻害薬の体重に対する効果は中立的と考えられており

[4,6]、今回の結果は過去の研究と一致している。

### **腎機能障害を有する患者での安全性**

本調査において、腎機能別のすべてのADR（特に腎機能障害関連ADR）と重篤なADRの発現割合は、G4およびG5群がG1群より高値であった。腎機能障害を有する患者は概して併存症や多剤併用など複数の要因によりAEが発現しやすい[51]。実際に「RUBY」でも、腎機能障害進行例では併存症の有病率が高かった。本解析には、各サブグループの患者数のばらつき、腎機能障害の各区分にマッチした対照群の欠如など、既報[24,25]と同様なリミテーションについて認識しなければならない。しかしながら、今回得られた知見により、このような患者では慎重な観察が重要であることが示された。

腎機能障害患者では、例えばインスリンクリアランスの低下や腎での糖新生障害などいくつかの理由によって、低血糖のリスクも増大する[8, 52,53]。腎機能障害患者で認められた低血糖は、低血糖と関連がある他の糖尿病治療薬（インスリン、スルホニルウレア薬またはグリニド薬）とテネリグリプチンの併用例で主に発現しており、腎機能障害患者においてテネリグリプチンとこれらの薬剤を併用する際は注意が必要である。

G1およびG2群ではeGFRは6ヵ月時に低下し、その後は一定となったのに対し、腎機能障害



患者では3年間にわたって eGFR 中央値に顕著な変化はみられなかった。一部の DPP-4 阻害薬はアルブミン/クレアチニン比を改善するが、eGFR は改善しないことが報告されている

[54]。本調査では患者間および評価時点間で eGFR の変化の程度にばらつきがあったが、腎臓に対するテネリグリプチンの影響を評価するためには、さらなる研究が必要と考える。

### テネリグリプチンの有効性

実臨床におけるテネリグリプチンの有効性についても評価した。HbA1c 値および FBG の有意な改善が観察され、その効果は投与開始から6ヵ月以内に認められ最長3年間にわたり持続した。これらの知見は、テネリグリプチンの投与により HbA1c 値の低下が52週間にわたって示された複数の臨床試験成績 [22]、およびリナグリプチン [30,31]、シタグリプチン [32-34]、ビルダグリプチン [35]、オマリグリプチン [36]、アナグリプチン [37,38] をさまざまな期間、日本人 T2DM 患者に投与した報告と類似している。

本解析のもう1つの目的は、6つの eGFR 区分に該当する患者集団と透析例でテネリグリプチンの有効性を検討することであった。その結果、G1~G4 群では HbA1c 値がベースラインから3年間にわたって低下した。G5 群の HbA1c 値は、低下あるいは低下傾向を示したが、投与1年後以降は有意ではなく、その理由として、ベースライン値が低かったことや、患者数が少なかったことがあるかもしれない。ベースラインの HbA1c 値で調整した結果、3年時における HbA1c 値の変化量の最小二乗平均は G1~G5 群で-0.76%から-0.66%の範囲であり、6群間で有意な差はなかった。透析例ではグリコアルブミンが有意に減少した。これらの結果は、腎機能障害を有する T2DM 患者 [55]、または血液透析患者 [56,57] を対象としたテネリグリプチンの既存の研究と一致している。

## テネリグリプチンの増量

さらに、テネリグリプチンを 40 mg へ増量した患者における安全性・有効性プロファイルについても考察したい。本調査では、40 mg/日を用いた患者の ADR および重篤な ADR の発現割合は、「RUBY」全体集団ならびに第 III 相臨床試験においてテネリグリプチンを 20 mg から 40 mg へ増量した 204 例のプール解析（増量前 4.9%、増量後 7.4%） [58] と類似していた。このプール解析で最も発現割合が高かった ADR は低血糖であるが、その割合は増量後の患者でも増えていなかった。「RUBY」における有効性に関しては、HbA1c 値は増量後に低下し、増量開始からの平均変化量は-0.33%であった。前述の第 III 相臨床試験のプール解析では、204 例中 108 例で増量後に HbA1c 値の低下がみられ、その平均変化量は-0.50%であった [58]。これらの結果は、テネリグリプチン 20 mg で血糖コントロールが十分に改善されない患者の場合、40 mg への増量が HbA1c 値の改善に有用であることを示唆する。

## 本調査の限界

本調査で考えられる限界として、対照群がないこと、一部の患者における観察期間中の併用薬変更や生活習慣の変化などを述べたい。これらは安全性と有効性に寄与した可能性があるが、このような治療法の変更や生活習慣の変化が安全性および有効性に及ぼす影響は評価できなかった。また、患者あるいは処方医が報告しなかった AE や ADR、あるいは医師がテネリグリプチンとの因果関係を誤って否定したケースがあるかもしれない。それが一部の AE や ADR の過少報告につながった可能性があるという点で、報告バイアスの可能性についても認識しなければならない。また、臨床検査データも相当数の患者で得られなかった。ただし、この問題は市販後調査や実臨床の研究では一般的な問題であり、一部の臨床検査はルーチンとなっていない、あるいは症例報告書への記録に適した時点で行われていない可能性がある。日本においては FBG がルーチンで実施されていないことに注意しなければならない。さらに、医学的にみて

一般に合理的とはいえない値（すなわち、通常より著しく高値または低値、あるいは生理学的に考えられないような値）を処方医が入力しているケースもありうる。以上のような限界にもかかわらず、本調査にはいくつかの強みがある。特に患者の約 1/3 が何らかの理由でテネリグリプチンを中止したが、サンプルサイズは大きく、かつ調査期間が長かった（投与期間中央値 1,096 日）。これらの強みは、実臨床でのテネリグリプチン長期投与について重要な知見をもたらし得る。

## 結論

結論として、実臨床の T2DM 患者に対するテネリグリプチンの長期投与において、本市販後調査で得られた安全性プロファイルは、すでに確立されているテネリグリプチンあるいは他の DPP-4 阻害薬の安全性プロファイルと顕著な違いは認められなかった。テネリグリプチンの有効性は実臨床において 3 年間にわたり維持されることも確認され、長期使用を支持する結果であった。腎機能障害患者や透析患者においてもテネリグリプチンの安全性と有効性は保たれていた。
